1 A Single Mechanosensitive Channel Protects *Francisella tularensis* subsp. *holarctica* from  
2 Hypoosmotic Shock and Promotes Survival in the Aquatic Environment.

3

4

5 David R. Williamson<sup>a</sup>, Kalyan K. Dewan<sup>a\*</sup>, Tanmay Patel<sup>a</sup>, Catherine M. Wastella<sup>b,c</sup>, Gang  
6 Ning<sup>b,c</sup> and Girish S. Kirimanjeswara<sup>a#</sup>.

7

8 Department of Veterinary and Biomedical Sciences, Pennsylvania State University, University  
9 Park, PA, USA<sup>a</sup>; Microscopy Facility, The Huck Institutes of the Life Sciences<sup>b</sup>, and Department  
10 of Biology, Pennsylvania State University, University Park, PA, USA<sup>c</sup>.

11

12 Running Title: Hypoosmotic shock protection in *F. tularensis*.

13

14 #Address Correspondence to Girish S. Kirimanjeswara, [gsk125@psu.edu](mailto:gsk125@psu.edu)

15

16 \*Present Address: Center for Vaccines and Immunology, University of Georgia, Athens, GA,  
17 USA.

18

19

20

21 **Abstract**

22 *Francisella tularensis* subspecies *holarctica* is found throughout the northern hemisphere and  
23 causes the disease tularemia in humans and animals. An aquatic cycle has been described for this  
24 subspecies, which has caused water-borne outbreaks of tularemia in at least 10 countries. In this  
25 study, we sought to identify mechanosensitive channel(s) required for the bacterium to survive  
26 the transition from mammalian hosts to freshwater, which is likely essential for transmission of  
27 the bacterium between susceptible hosts. A single mechanosensitive channel MscS (FTL\_1753),  
28 among the smallest members of the mechanosensitive channel superfamily, was found to protect  
29 subsp. *holarctica* from hypoosmotic shock. Deletion of this channel did not affect virulence  
30 within the mammalian host, however *mscS* was required to survive the transition from the host  
31 niche to fresh water. Deletion of *mscS* did not alter the sensitivity of *F. tularensis* subspecies  
32 *holarctica* to detergents, H<sub>2</sub>O<sub>2</sub>, or antibiotics, suggesting that the role of MscS is specific to  
33 protection from hypoosmotic shock. Interestingly, deletion of *mscS* also led to reduced average  
34 cell size without altering gross cell morphology. The small mechanosensitive channel identified  
35 and characterized in this study likely contributes to the transmission of tularemia between hosts  
36 by allowing the bacterium to survive the transition from mammalian hosts to fresh water.

37

38 **Importance**

39 Contamination of fresh water by *Francisella tularensis* subspecies *holarctica* has resulted in a  
40 number of outbreaks of tularemia. Invariably, contamination originates from the carcasses or  
41 excreta of infected animals, and thus involves an abrupt osmotic shock as the bacteria enter fresh  
42 water. How *F. tularensis* survives this drastic change in osmolarity has not been clear, but here  
43 we report that a single mechanosensitive channel protects the bacterium from osmotic

44 downshock. This channel is functional despite being notably smaller (165 a.a.) than those found  
45 in model organisms (~280 a.a.). These findings extend our understanding of the aquatic cycle  
46 and ecological persistence of *F. tularensis*, with further implications for mechanosensitive  
47 channel biology.

48

49 **Introduction**

50 *Francisella tularensis* is a gram-negative bacterium responsible for the disease tularemia in  
51 humans and a wide range of animal species. Two subspecies of *F. tularensis* are of clinical  
52 significance for humans, ssp. *tularensis* and *holarctica* (1). Subspecies *tularensis* is considered  
53 more virulent, and is primarily confined to Northern America. Subspecies *holarctica* on the other  
54 hand is broadly distributed throughout the northern hemisphere, and has also been found in  
55 Australia (2). The manifestations of tularemia vary depending upon the route of exposure. The  
56 ulceroglandular and glandular forms of tularemia are more frequent and are associated with  
57 exposure via arthropod bites or direct contact with infected animals, leading to localized  
58 lymphadenopathy with or without the formation of an ulcer at the inoculation site (1, 3, 4).  
59 Another common manifestation is oropharyngeal tularemia, where ingestion of contaminated  
60 water leads to pharyngitis and swelling of the cervical lymph nodes (1). Rare presentations  
61 include oculoglandular tularemia, involving conjunctivitis resulting from inoculation of the eye;  
62 as well as typhoidal and pneumonic tularemia, which are both severe systemic diseases resulting  
63 from inhalation of *F. tularensis* (pneumonic) or with no obvious route of exposure (typhoidal)  
64 (3).

65  
66 Tularemia is considered a zoonotic disease that is rarely, if ever, transmitted by human-to-human  
67 contact (3). Hence, understanding how the bacterium persists and spreads in the environment is  
68 important. While long-term reservoirs and transmission cycles of *F. tularensis* are not well  
69 understood (5), the role of fresh water is of particular interest in the ecology of the broadly  
70 distributed *F. tularensis* subsp. *holarctica*, for which an aquatic cycle has been described (1).  
71 Many large outbreaks of tularemia are of the oropharyngeal form, and are linked to direct

72 ingestion of water contaminated with *F. tularensis* subsp. *holarctica*. Outbreaks of tularemia  
73 from contaminated drinking water have been reported in at least 10 countries, totaling thousands  
74 of cases. Such outbreaks have been reported in Turkey (6–8), Sweden (9), Germany (10), Norway  
75 (11–13), Russia (14, 15), Bulgaria (16, 17), Kosovo (18, 19), The Czech Republic (20), Italy (21,  
76 22) and the Republic of Georgia (23). Isolated cases of tularemia associated with infection from  
77 fresh water have also been described in France (24, 25) and the USA (26). In many of these  
78 cases, *F. tularensis* was detected by PCR (10–13, 20) or cultured (8, 9, 15–17, 23, 26) from  
79 water of the affected area.

80  
81 As the presence of viable *F. tularensis* subsp. *holarctica* in fresh water is directly responsible for  
82 many naturally occurring cases of oropharyngeal tularemia, it is important to understand how the  
83 bacterium adapts and survives in water. *F. tularensis* subsp. *holarctica* has been shown to  
84 survive in otherwise sterile fresh water for 7-40 days (27, 28). Persistence may be enhanced by  
85 the presence of amoebae or ciliates (29, 30), but the bacterium is not able to persist in fresh water  
86 indefinitely (27, 28), and is often only seasonally recovered from natural bodies of water (7, 31).  
87 This suggests that *F. tularensis* is introduced to bodies of water shortly before outbreaks, and  
88 indeed almost all cases of water contamination are attributed to the carcasses or excreta of  
89 infected animals including hares, rodents, voles, lemmings, muskrats, and beavers (6–8, 10–12,  
90 16, 17, 19, 22, 26, 31–33). The shift from an animal to a fresh water niche involves an abrupt  
91 decrease in extracellular osmolarity, producing a hypoosmotic shock (or ‘downshock’).

92  
93 Downshock results in an rapid influx of water into the cytoplasm, increasing tension on the  
94 membrane and potentially leading to lysis of the cell (34). To prevent this outcome, bacteria rely

95 on mechanosensitive channels, which open in response to physical stretch of the membrane and  
96 jettison osmolytes (35). By doing so, mechanosensitive channels relieve pressure, restore  
97 isotonicity, and allow survival of hypoosmotic shock (36). In this study, we sought to identify the  
98 mechanosensitive channel(s) that protect *F. tularensis* subsp. *holarctica* from hypoosmotic  
99 shock, allowing it to survive the transition from a host to fresh water. We bioinformatically  
100 identified prospective mechanosensitive channels in subsp. *holarctica*, deleted candidate genes,  
101 and characterized the resulting mutants. We show that a single Mechansensitive Ion Channel  
102 protein (MscS) is required for surviving the transition from mammalian cells to fresh water.  
103 Notably, the mechanosensitive channel gene identified herein is among the smallest members of  
104 the mechanosensitive channel superfamily. Bacteria lacking this channel display a specific defect  
105 in survival of osmotic shock, -while sensitivities to detergents, H<sub>2</sub>O<sub>2</sub> and antibiotics were not  
106 affected. We also demonstrate that deletion of this gene results in a decrease in cell size, but does  
107 not affect the bacterium's ability to replicate in macrophages or cause disease in a mouse model  
108 of tularemia. Together, these data indicate that MscS is critical for survival of *F. tularensis* in  
109 fresh water environments, and plays a major role in the bacterium's ecological persistence.  
110

111 **Results**

112 ***F. tularensis Live Vaccine Strain mechanosensitive channels closely resemble those found in***  
113 ***clinical and environmental strains.***

114 We first sought to compare putative mechanosensitive channels in various *F. tularensis* subsp.  
115 *holarctica* strains, in order to determine whether the Live Vaccine Strain (LVS) was an accurate  
116 representation of other members of the subspecies. We compared LVS to a human clinical  
117 isolate (FSC200), an isolate from a beaver (OSU18) and an isolate from drinking water (R13-  
118 38). Our search yielded four loci predicted to code for mechanosensitive channels in each  
119 genome (FTL\_1753, FTL\_0945, FTL\_1588, and FTL\_1209 in LVS). Two genes (FTL\_1753 and  
120 FTL\_0945) were identical in all four strains of subsp. *holarctica* (Fig. S1 & S2). When we  
121 performed our initial bioinformatic comparison, FTL\_1588 was annotated as a pseudogene in  
122 RefSeq (8-12-2015 annotation with NCBI software revision 3.0). Nevertheless, our analysis of  
123 FTL\_1588 revealed that it was identical between LVS and FSC200 (Fig. S3). However, in  
124 OSU18, a small deletion at the beginning of the open reading frame, a potential membrane  
125 localization sequence, was observed (Fig. S3). A gap in the WGS assembly of R13-38 precluded  
126 this strain from comparison. The final hit was annotated as a pseudogene (FTL\_1209) due to  
127 frameshift in all four strains. Taken together, these data show that the Live Vaccine Strain codes  
128 for mechanosensitive channels and is an accurate representation of clinical and environmental  
129 subsp. *holarctica* strains.

130

131 ***A single mechanosensitive channel protects F. tularensis subsp. holarctica from hypoosmotic***  
132 ***shock.***

133 We next sought to determine which of the predicted mechanosensitive channels conferred  
134 protection from hypoosmotic shock/downshock. Because FTL\_1753 and FTL\_0945 were found  
135 in all four strains of *F. tularensis* subspecies *holarctica*, marker-less, in-frame deletions of these  
136 two genes were generated in the Live Vaccine Strain (Fig. S4). A hypoosmotic shock of 300mM  
137 had little impact on the viability of WT or  $\Delta$ FTL\_0945 strains, but killed >90% of  $\Delta$ FTL\_1753  
138 cells, indicating this gene is required for bacterial survival following an osmotic downshock (Fig.  
139 1A). To determine the magnitude of osmotic shock required to kill  $\Delta$ FTL\_1753 in media, we  
140 measured survival after graded downshocks of 100, 200 or 300mM. The downshock of 300mM  
141 killed the vast majority of  $\Delta$ FTL\_1753 cells as before; 200mM downshock caused a moderate but  
142 significant loss of viability, and a 100mM downshock did not result in any loss of viability (Fig.  
143 1B). These data for  $\Delta$ FTL\_1753 are similar to prior observations for *E. coli* lacking two  
144 mechanosensitive channel genes, *mscS* and *mscL* (36). *Trans*-complementation with an  
145 expression plasmid for FTL\_1753 completely restored the ability of  $\Delta$ FTL\_1753 to survive all  
146 three graded downshocks (Fig. 1B). Finally, we tested whether the observed phenotype was  
147 relevant to surviving the transition from a mammalian host to fresh water, by equilibrating  
148 bacteria in PBS then diluting them into natural lake water or double distilled water. While  
149  $\Delta$ FTL\_1753 was unable to survive in lake water and distilled water, wild-type,  $\Delta$ FTL\_0945, and  
150 *trans*-complemented strain of  $\Delta$ FTL\_1753 were able to survive in both conditions (Fig. 1C).  
151 These data demonstrate that FTL\_1753, but not FTL\_0945, encodes a functional  
152 mechanosensitive channel that is required by *F. tularensis* subsp. *holarctica* to survive  
153 hypoosmotic shock, including that encountered when the bacterium transitions from a  
154 mammalian host to fresh water.

155



156

157

158 ***ΔFTL\_1753 bacteria are not more sensitive to detergents, H<sub>2</sub>O<sub>2</sub> or antibiotics.***

159 To establish whether deletion of FTL\_1753 or FTL\_0945 resulted in more generalized  
160 vulnerability to stressors, we tested these strains for sensitivity to three detergents and H<sub>2</sub>O<sub>2</sub>. The  
161 three detergents included an anionic detergent (SDS), a cationic detergent (CTAB), and a  
162 nonionic detergent (Triton-X100). In contrast to the large differences observed in survival of  
163 downshock, all strains displayed a similar sensitivity profile to these stressors (Fig. 2). As  
164 mechanosensitive channels have been associated with antibiotic sensitivity in some contexts (41–  
165 43), we determined the minimum inhibitory concentrations (MICs) of 9 antibiotics for these  
166 strains. The knockout strains displayed identical sensitivity as the wild-type, with the exception  
167 of ΔFTL\_1753 appearing slightly more resistant to kanamycin (Table S1). These data support a  
168 specific role for MscS in survival of hypoosmotic shock, rather than a more general role in  
169 resistance of physical or chemical stressors.

170

171 ***MscS does not contribute to virulence in the host niche, but is required to survive the***  
172 ***transition from that niche to fresh water.***

173 We next sought to determine the roles of FTL\_1753 and FTL\_0945 in the context of the  
174 mammalian host niche. As *F. tularensis* is an intracellular pathogen that predominantly targets  
175 macrophages, we tested the ability of these strains to proliferate in macrophages using  
176 gentamicin protection assays. Similar intra-macrophage growth was observed for all strains,  
177 suggesting that these genes do not contribute to *F. tularensis* replication within host cells (Fig.  
178 3A). For the most part, mammalian tissues are maintained at similar osmolarities. However,

179 some large osmotic gradients are found in mammals, most notably in the Kidneys and Liver. To  
180 determine whether FTL\_1753 or FTL\_0945 contribute to the pathogenesis of *F. tularensis* in the  
181 mammalian host, we tested these mutants in a mouse model of pneumonic tularemia. Mice  
182 infected with all strains displayed similar survival profiles, suggesting that these genes do not  
183 contribute to virulence within a host (Fig. 3B). Finally, we tested whether FTL\_1753 is required  
184 for surviving the transition from a mammalian cell niche to fresh water, using modified  
185 gentamicin protection assay. After eliminating extracellular bacteria, infected macrophages were  
186 lysed with either detergent in PBS, or with ddH<sub>2</sub>O. Similar numbers of viable bacteria were  
187 recovered using the PBS-detergent lysis buffer. In contrast, FTL\_1753 was required for bacteria  
188 to survive macrophage lysis with ddH<sub>2</sub>O (Fig. 3C). Collectively, these data suggest that MscS is  
189 not required for virulence within the mammalian host niche, but is required to survive the  
190 transition from this niche to fresh water.

191

192 ***ΔFTL\_1753 cells are smaller in average size compared to the wild-type.***

193 As there are reports of mechanosensitive channels affecting cellular morphology (41), and we  
194 observed that ΔFTL\_1753 often formed smaller colonies than the wild-type, we examined wild-  
195 type and ΔFTL\_1753 cells using scanning electron microscopy. ΔFTL\_1753 cells were of  
196 smaller average size than the wild-type; 2D outline traces revealed significantly smaller areas  
197 and perimeters compared to the wild-type (Fig. 4A-F). Although smaller in average size,  
198 ΔFTL\_1753 cells had a similar overall morphology to the wild-type, and there was no difference  
199 in the aspect ratio of fitted elliptical axes (Fig. 4G). These data show that the absence of  
200 FTL\_1753 leads to smaller average bacterial cell size, but does not lead to other gross  
201 morphological changes compared to wild-type *F. tularensis* LVS.

202

203 ***Comparative bioinformatics reveal heterogeneity in the mechanosensitive channels encoded***  
204 ***by *F. tularensis* subspecies.***

205 We chose to focus our study on the *holarctica* subspecies of *F. tularensis*, as this is the  
206 subspecies for which an aquatic cycle has been described, and which is responsible for outbreaks  
207 of tularemia from contaminated water. Nonetheless, as there is great interest in the highly  
208 virulent subsp. *tularensis* and also subsp. *novicida*, we compared the loci predicted to code for  
209 mechanosensitive channels in these subspecies to the loci present in subsp. *holarctica*. Of the  
210 four loci, the one corresponding to FTL\_1753 was most highly conserved between the three  
211 subspecies, with only 1-2 amino acid substitutions between them (Fig. 5A and S5). Interestingly,  
212 the equivalent of FTL\_1753 in the prototypical subsp. *tularensis* (Schu S4) genome is currently  
213 annotated as a pseudogene. However, our data and analyses suggest this is erroneous and should  
214 be corrected as explained in the discussion. The remaining three loci display marked  
215 heterogeneity between the *F. tularensis* subspecies. In the set of loci equivalent to FTL\_0945,  
216 the C-terminal 44% of the protein is lacking in both ssp. *holarctica* and *tularensis* relative to ssp.  
217 *novicida* (Fig. 5B and S6). In another set, the N-terminal ~25% is absent in subsp. *holarctica*  
218 relative to the others (Fig. 5C and S7). In the final set, a frameshift has resulted in a premature  
219 stop codon and pseudogene annotation in subsp. *holarctica* (Fig. 5D and S8). Overall, these data  
220 suggest that: 1) the mechanosensitive channel found to protect *F. tularensis* subspecies  
221 *holarctica* from hypoosmotic shock in this study is conserved between the *F. tularensis*  
222 subspecies; and 2) the other loci predicted to code for mechanosensitive channels exhibit  
223 considerable heterogeneity between the subspecies.

224

225 **Discussion**

226 The contamination of fresh water by *F. tularensis* subsp. *holarctica* is relevant to the bacterium's  
227 ecological persistence and transmission to hosts, including humans. *F. tularensis* can only persist  
228 in fresh water for a limited time (27, 28), and is seasonally recovered from natural bodies of  
229 water, suggesting recurrent cycles of contamination (7, 31). Early soviet researchers reported  
230 that a single infected animal could contaminate 500,000L of water (44), and infected animals are  
231 indeed implicated in virtually all cases of water contamination with *F. tularensis* (6–8, 10–12,  
232 16, 17, 19, 22, 26, 31–33). To survive an osmotic downshock, such as that encountered when  
233 going from a mammalian host to fresh water, bacteria rely on mechanosensitive channels which  
234 act as 'pressure relief valves'. In this study, we have identified a mechanosensitive channel  
235 which protects *F. tularensis* subsp. *holarctica* from hypoosmotic shock (FTL\_1753). The  
236 survival profile of  $\Delta$ FTL\_1753 upon downshocks of 100-300mM (Fig. 1B) closely resembles  
237 that of *E. coli* lacking both *mscL* and *mscS* (36), and is consistent with the notion that this is the  
238 single downshock-protective mechanosensitive channel in the subspecies. We demonstrated that  
239 the results of this study are applicable to clinical and environmental strains of subsp. *holarctica*  
240 (supplementary Fig. 1-3), and that bacteria lacking FTL\_1753 are unable to survive the transition  
241 from the osmolarity of the mammalian host to fresh water (Fig. 1C and 3C). Notably, FTL\_1753  
242 has been found to be up-regulated within the intracellular growth niche( 45); speculatively this  
243 may be to increase chances of survival in the event of a shift to a freshwater niche.

244

245 The presence of *F. tularensis* subsp. *holarctica* in fresh water has led to outbreaks of mostly  
246 oropharyngeal tularemia in at least 10 countries, as described earlier. Oropharyngeal tularemia is  
247 often initially misdiagnosed, and without appropriate treatment, it can become a chronic

248 debilitating disease with the risk of serious complications (23). In addition, the aquatic cycle of  
249 subsp. *holarctica* can be implicated in many cases of ulceroglandular tularemia; water is thought  
250 to facilitate the spread of bacteria between animals and to mosquito vectors. In cases where  
251 humans develop ulceroglandular tularemia from mosquito bites, mosquitos may acquire the  
252 bacterium from water during their development. In Sweden, where most cases of tularemia are  
253 associated with mosquito bites (3, 46), a strong association has been found between infection and  
254 recreational areas near water (47). Furthermore, mosquito larvae reared in pond water from  
255 endemic areas, or experimentally exposed to *F. tularensis* during development, have been shown  
256 to harbor *F. tularensis* as adults (48, 49). In cases where humans develop ulceroglandular  
257 tularemia from handling infected animals, *F. tularensis* can often be found in water within the  
258 animals' habitat (26, 33, 50); the presence of viable bacteria in the water is thought to contribute  
259 to the spread and persistence of infection among animal populations (26, 33). Thus, the  
260 mechanosensitive channel identified here is likely to be important to the overall ecological  
261 persistence of *F. tularensis* and its transmission to humans and other susceptible hosts.

262

263 Bioinformatically, we identified four loci predicted to contain mechanosensitive channel  
264 domains in each *F. tularensis* genome surveyed, including in subsp. *tularensis* and subsp.  
265 *novicida* (Fig. 5, S1-S3, S5-S8). Notably, FTL\_1753 was the most conserved between the  
266 subspecies, with only one amino acid substitution between ssp. *holarctica* and *tularensis* (Fig.  
267 5A, S5). At 165 amino acids, FTL\_1753 is in the smallest 2% of the mechanosensitive channel  
268 superfamily, which contains over 69,000 members. It is also considerably smaller than MscS in  
269 the model organisms in *E. coli* and *B. subtilis*, which are approximately 280 amino acids. This  
270 has led to a 'partial' annotation in the non-redundant protein record for FTL\_1753

271 (WP\_003017262.1), and a pseudogene annotation in the manually curated subsp. *tularensis*  
272 SchuS4 genome. Our data demonstrate that despite its small size, this gene does indeed code for  
273 an active mechanosensitive channel that protects from downshock. The other loci containing  
274 mechanosensitive channel domains exhibited considerable heterogeneity between subspecies.  
275 The functions of these remain to be determined, but in subsp. *holarctica* may include roles other  
276 than osmotic shock protection. For instance, other members of the superfamily have been shown  
277 to play roles in signal transduction (51).

278

279 In conclusion, we have identified a small, 165 amino acid mechanosensitive channel that protects  
280 *F. tularensis* subsp. *holarctica* from downshock. This channel is required for the bacterium to  
281 survive the transition from mammalian hosts to fresh water, and likely contributes to ecological  
282 persistence of *F. tularensis* and transmission between hosts.

283

284 **Materials and Methods**

285

286 ***Bioinformatic analysis of msc-domain containing genes in F. tularensis.*** The amino acid  
287 sequences of mechanosensitive channels (MscS & MscL) that protect *E. coli* from downshock  
288 (36) were retrieved from UniprotKB, and input into the Conserved Domain Architecture  
289 Retrieval Tool (CDART) (37). Results were filtered to the *Francisella* genus using the NCBI  
290 taxonomy tree to identify genes containing msc domains in the strains of interest. ORF and gene  
291 sequences were retrieved from RefSeq genomes, compared using standard protein BLAST and  
292 Needleman-Wunsch global alignment, and visualized using Multiple Align Show  
293 ([http://www.bioinformatics.org/sms/multi\\_align.html](http://www.bioinformatics.org/sms/multi_align.html)).

294

295 ***Bacterial strains and growth conditions.*** *Francisella tularensis* subsp. *holarctica* Live Vaccine  
296 Strain (LVS) was obtained from Albany Medical College and was grown on MH chocolate agar  
297 (Mueller-Hinton II agar (BD BBL) supplemented with 1% hemoglobin (remel) and 1%  
298 isovitalex (BD BBL)). Liquid cultures of *F. tularensis* were routinely grown in Brain Heart  
299 Infusion Broth, Modified (BHI, BD BBL #299070) at pH 6.4-6.8. Cloning procedures were  
300 performed using DH5 $\alpha$  *E. coli* grown in LB broth, Miller (BD Difco) or LB agar, Miller (EMD  
301 chemicals). Liquid cultures were incubated at 37°C in an orbital shaker operating at 200rpm.  
302 Agar plates were incubated at 37°C, 5% CO<sub>2</sub> for 48-72 hours.

303

304 ***Primers, plasmids and DNA manipulation.*** All primers used in this study are shown in table 1.  
305 The pMP812 *sacB* suicide vector (38) was used to generate targeted, marker-less, in-frame  
306 deletions of desired genes. Briefly, 700-900 base pair PCR products flanking the sequence to be

307 removed were amplified, digested and ligated together, then re-amplified as one unit and cloned  
308 into the mcs of pMP812. A complementation plasmid for *mcsS* was generated by modifying the  
309 pKK214-GFP plasmid (29). First, the GroEL promoter and GFP gene were removed by digestion  
310 with *Xba*I and *Eco*RI. A multiple cloning site with four restriction sites was then added by  
311 annealed oligo cloning, with phosphorylated MCS<sub>4</sub>\_1 & \_2 oligonucleotides, to generate  
312 pKK214-MCS<sub>4</sub>. The bacterioferritin promoter and FTL\_1753 were amplified, digested and  
313 ligated together, then re-amplified as one unit and cloned into pKK214-MCS<sub>4</sub> with *Eco*RI. The  
314 resulting plasmid is referred to as p-1753. All oligonucleotides were synthesized by Integrated  
315 DNA Technologies or the Penn State Genomics Core Facility. All enzymes were from New  
316 England Biolabs. Vent<sub>R</sub> DNA polymerase was used for cloning and Taq DNA polymerase for  
317 screening. Genomic DNA was isolated from *F. tularensis* using an E.Z.N.A. Bacterial DNA Kit  
318 (Omega Bio-Tek) and plasmid DNA was isolated using an E.Z.N.A Plasmid DNA Mini Kit I  
319 (Omega Bio Tek).

320

321 ***Generation of in-frame deletions via allelic exchange and trans-complementation.*** Marker-  
322 less, in-frame deletions of FTL\_1753 (new locus tag FTL\_RS08965) and FTL\_0945 (new locus  
323 tag FTL\_RS04830) were generated using the pMP812 *sacB* suicide vectors as previously  
324 described (38). PCR was used to screen for secondary recombinants with deletions, as outlined in  
325 Fig. S4. *Trans*-complementation of FTL\_1753 was achieved by introducing the p-1753 plasmid  
326 into a confirmed  $\Delta$ FTL\_1753 strain. Electrocompetent *F. tularensis* cells were prepared as  
327 previously described (39), except that electroporations were done using 0.1cm gap cuvettes  
328 (VWR) and Bio-Rad micropulser using Ec1 settings (1.8kV, 10 $\mu$ F and 600 $\Omega$ ).

329



330 ***Hypoosmotic shock assays.*** For downshock experiments conducted in media, single colonies of  
331 each strain were picked from MH-chocolate agar plates and grown in BHI supplemented with  
332 300mM NaCl (EMD chemicals). Mid-log cultures were diluted (in BHI +300mM NaCl) to a  
333 concentration of approximately  $5 \times 10^5$  CFU/mL, then 20 $\mu$ L of each culture added to 980 $\mu$ L of  
334 BHI +300, +200, +100 or +0 mM NaCl, to produce hypoosmotic shocks of 0, 100, 200 and  
335 300mM, respectively. The resulting cultures were vortexed and incubated for 1hr at room  
336 temperature, before plating on MH chocolate agar with the same concentrations of NaCl added  
337 to prevent further osmotic shock. Percent survival was calculated by comparing viable counts  
338 from cultures subject to downshock to cultures maintained with 300mM NaCl throughout the  
339 experiment. For downshock experiments from PBS to fresh water, a similar method was used,  
340 except that no NaCl was added to growth media, and cells were equilibrated in PBS for 30  
341 minutes before dilution into fresh water for 10 minutes. To test a source of water more naturally  
342 relevant than double-distilled H<sub>2</sub>O, water was retrieved from a freshwater lake in Pennsylvania  
343 and passed through a 0.2 $\mu$ m filter.

344

345 ***H<sub>2</sub>O<sub>2</sub> and detergent sensitivity assays.*** Single colonies of each strain were picked from MH-  
346 chocolate agar plates and grown in BHI. Early-log phase cultures were diluted to a concentration  
347 of approximately  $4 \times 10^4$  CFU/mL, and added 1:1 to plain media or media with 2X the final  
348 desired concentration of detergent or H<sub>2</sub>O<sub>2</sub>. All dilutions and challenges were performed in  
349 identical media, such that the only variable would be the detergent/ H<sub>2</sub>O<sub>2</sub>. These cultures were  
350 vortexed and incubated for 1 hour at room temperature, before being diluted 1/10 in BHI, and  
351 100 $\mu$ L plated to enumerate viable CFUs. Percent survival was calculated relative to the negative  
352 control plates for the same strain (which yielded ~200 CFU).

353 ***Determination of antibiotic minimum inhibitory concentrations.*** 2-fold serial dilutions of each  
354 antibiotic were prepared and added to 96 well plates. Bacterial cultures were grown overnight,  
355 diluted to an OD<sub>600</sub> of 0.050, and added 1:1 to plate wells containing media/antibiotics, in  
356 triplicate. Plates were incubated overnight (~18h), and bacterial growth determined by measuring  
357 optical density at 600nm. The MIC was defined as the lowest final concentration of antibiotic for  
358 which cultures did not grow beyond an OD<sub>600</sub> of 0.1.

359

360 ***Intra-macrophage replication and macrophage-to-freshwater downshock assays.*** Raw 264.7  
361 macrophages were maintained in complete DMEM (DMEM +10% FBS, 1mM sodium pyruvate,  
362 2mM L-glutamine, 10mM HEPES, 1X non-essential amino acids). For intra-macrophage  
363 replication assays, Raw 264.7 macrophages were seeded at a concentration of  $3 \times 10^5$  cells per  
364 well in 24 well tissue culture plates (Greiner Bio One) the evening before the assay.  
365 Macrophages were infected with early-log, BHI-grown *F. tularensis* at a multiplicity of infection  
366 of 100 bacteria per macrophage. Plates were centrifuged to facilitate synchronized infection (10  
367 minutes,  $300 \times g$ , RT). After a one hour incubation to allow for bacterial uptake, media was  
368 aspirated and replaced with media containing 100 $\mu$ g/mL gentamicin (Gibco) to kill extracellular  
369 bacteria. Following an additional one hour incubation, cells were washed twice with PBS. For  
370 wells designated for later time points, fresh media (without antibiotic) was added. Cells in other  
371 wells were lysed by the addition of 100 $\mu$ L/well of 0.1% w/v sodium deoxycholate (sigma) in  
372 PBS. After lysis was observed, 900 $\mu$ L of PBS was added to each well, and serial dilutions plated  
373 on MH chocolate agar to determine the number of bacteria that had been taken up by  
374 macrophages. 20 hours post-infection, cells were similarly lysed and plated to determine the  
375 number of bacteria present. Macrophage-to-freshwater downshock assays were done in a similar

376 fashion but with the following alterations:  $5 \times 10^4$  cells were seeded per well to minimize the  
377 contribution of intracellular salt carryover during lysis, and cells were lysed at the 2 hour  
378 timepoint only using 200 $\mu$ L/well of either ddH<sub>2</sub>O or PBS +0.1% w/v sodium deoxycholate.

379

380 ***Mouse infections.*** C57BL/6J mice were maintained in specific pathogen-free conditions at the  
381 Pennsylvania State University animal care facilities. Isoflurane-anesthetized mice (n=8 per  
382 group) were infected intranasally with 10,000 CFU of bacteria in 50 $\mu$ L of PBS. Serial dilutions  
383 of the inoculum were plated on MH chocolate agar to confirm the correct dose was administered.  
384 Body weight was measured daily, and mice that lost 20% or more of their starting body weight  
385 were euthanized and counted as having succumbed to infection, per Institutional Animal Care  
386 and Use Committee (IACUC) guidelines. Experimental groups were age and sex matched.

387

388 ***Electron Microscopy.*** 5mL bacterial cultures were grown to an OD<sub>600</sub> of approximately 0.5 and  
389 rinsed twice by centrifuging at 1500 x g for 4 minutes then resuspending in pre-warmed media.  
390 Cells were fixed by resuspending in 2% glutaraldehyde (Electron Microscopy Sciences) in PBS  
391 for 30 minutes at room temperature, then overnight at 4°C. The cell suspension was applied onto  
392 Poly-L-Lysine coated coverslips for 10 min at 4°C and proceeded for critical point drying in a  
393 chamber of Leica EM CPD300 (Leica Microsystems, Buffalo Grove, IL) critical point dryer  
394 through an automatic program. The coverslips were then mounted onto a double-sided carbon  
395 tape on a single pin aluminum SEM stab (Ted Pella, Redding, CA) and sputter coated with  
396 iridium on a rotation stage of Leica ACE600 (Leica Microsystems, Buffalo Grove, IL). The  
397 bacterial samples were examined and imaged in a Zeiss Sigma FE-SEM (Carl Zeiss Microscopy,

398 Thornwood, NY) at 2 kV. The images were analyzed to determine cell 2D area, perimeter length,  
399 and the aspect ratio of a fitted ellipse using ImageJ v1.50i(40).

400

401 **Statistics.** Statistical differences were determined as indicated in figure legends using GraphPad  
402 Prism 5.0.

403

404 **Ethics statement.** All animal experiments were carried out by following recommendations and  
405 approval from the Pennsylvania State University Animal Care and Use Committee (protocol  
406 46070) with great care taken to minimize suffering of animals.

407

408

409

#### 410 **Acknowledgements**

411 We sincerely thank Dr. Martin Pavelka, University of Rochester, For providing the pMP812  
412 plasmid, and Dr. Karl Klose, University of Texas at San Antonio, for providing the pKK214-  
413 GFP plasmid. We also thank The Huck Institutes of the Life Sciences for the facilities and  
414 technical support.

415

#### 416 **Funding Information**

417 This study was supported by a T32 training grant AI 074551 (NIAID/NIH) to DRW, AI077917  
418 (NIAID/NIH), AES4605 (USDA) and start up finds from Penn State University and The Huck  
419 Institutes of the Life Sciences to GSK. The funders had no role in study design, data collection  
420 and interpretation, or the decision to submit the work for publication.

421

422

423 **References**

- 424 1. Maurin M, Gyuranecz M. 2016. Tularaemia: clinical aspects in Europe. *Lancet Infect Dis*  
425 16:113–124.
- 426 2. Jackson J, McGregor A, Cooley L, Ng J, Brown M, Ong CW, Darcy C, Sintchenko V.  
427 2012. *Francisella tularensis* subspecies *holarctica*, Tasmania, Australia, 2011. *Emerg Infect*  
428 *Dis* 18:1484–1486.
- 429 3. Sjöstedt A. 2007. Tularemia: history, epidemiology, pathogen physiology, and clinical  
430 manifestations. *Ann N Y Acad Sci* 1105:1–29.
- 431 4. Jones CL, Napier BA, Sampson TR, Llewellyn AC, Schroeder MR, Weiss DS. 2012.  
432 Subversion of Host Recognition and Defense Systems by *Francisella* spp. *Microbiol Mol*  
433 *Biol Rev* 76:383–404.
- 434 5. Tärnvik A, Priebe H-S, Grunow R. 2004. Tularaemia in Europe: an epidemiological  
435 overview. *Scand J Infect Dis* 36:350–355.
- 436 6. Aktas D, Celebi B, Isik ME, Tutus C, Ozturk H, Temel F, Kizilaslan M, Zhu B-P. 2015.  
437 Oropharyngeal Tularemia Outbreak Associated with Drinking Contaminated Tap Water,  
438 Turkey, July-September 2013. *Emerg Infect Dis* 21:2194–2196.
- 439 7. Kilic S, Birdsall DN, Karagöz A, Çelebi B, Bakkaloglu Z, Arikan M, Sahl JW, Mitchell C,  
440 Rivera A, Maltinsky S, Keim P, Üstek D, Durmaz R, Wagner DM. 2015. Water as Source  
441 of *Francisella tularensis* Infection in Humans, Turkey. *Emerg Infect Dis* 21:2213–2216.

- 442 8. Karadenizli A, Forsman M, Şimşek H, Taner M, Öhrman C, Myrtenäs K, Lärkeryd A,  
443 Johansson A, Özdemir L, Sjödin A. 2015. Genomic analyses of *Francisella tularensis*  
444 strains confirm disease transmission from drinking water sources, Turkey, 2008, 2009 and  
445 2012. *Euro Surveill* 20:1–5.
- 446 9. Alm E, Advani A, Bråve A, Wahab T. 2015. Draft Genome Sequence of Strain R13-38  
447 from a *Francisella tularensis* Outbreak in Sweden. *Genome Announc* 3:e01517-14.
- 448 10. Kaysser P, Seibold E, Mätz-Rensing K, Pfeffer M, Essbauer S, Splettstoesser WD. 2008.  
449 Re-emergence of tularemia in Germany: presence of *Francisella tularensis* in different  
450 rodent species in endemic areas. *BMC Infect Dis* 8:157.
- 451 11. Larssen KW, Afset JE, Heier BT, Krogh T, Handeland K, Vikøren T, Bergh K. 2011.  
452 Outbreak of tularaemia in central Norway, January to March 2011. *Euro Surveill* 16:1–3.
- 453 12. Brantsaeter AB, Krogh T, Radtke A, Nygard K. 2007. Tularaemia outbreak in northern  
454 Norway. *Euro Surveill* 12:E070329.2.
- 455 13. Berdal BP, Mehl R, Haaheim H, Løksa M, Grunow R, Burans J, Morgan C, Meyer H.  
456 2000. Field detection of *Francisella tularensis*. *Scand J Infect Dis* 32:287–291.
- 457 14. Rogutskiĭ SV, Khramtsov MM, Avchinikov AV, Gar'kavaia OI, Larchenkova NV,  
458 Golovanov AM, Parfenova TA, Rudkovskaia LB. 1997. An epidemiological investigation  
459 of a tularemia outbreak in Smolensk Province. *Zh Mikrobiol Epidemiol Immunobiol* 2:33–  
460 37.

- 461 15. Karpoff SP, Antonoff NI. 1936. The Spread of Tularemia through Water, as a New Factor  
462 in Its Epidemiology. *J Bacteriol* 32:243–258.
- 463 16. Kantardjiev T, Ivanov I, Velinov T, Padeshki P, Popov B, Nenova R, Mincheff M. 2006.  
464 Tularemia outbreak, Bulgaria, 1997-2005. *Emerg Infect Dis* 12:678–680.
- 465 17. Christova I, Velinov T, Kantardjiev T, Galev A. 2004. Tularaemia outbreak in Bulgaria.  
466 *Scand J Infect Dis* 36:785–789.
- 467 18. Grunow R, Kalaveshi A, Kühn A, Mulliqi-Osmani G, Ramadani N. 2012. Surveillance of  
468 tularaemia in Kosovo, 2001 to 2010. *Euro Surveill* 17:1–7.
- 469 19. Reintjes R, Dedushaj I, Gjini A, Jorgensen TR, Cotter B, Lieftucht A, D’Ancona F, Dennis  
470 DT, Kosoy MA, Mulliqi-Osmani G, Grunow R, Kalaveshi A, Gashi L, Humolli I. 2002.  
471 Tularemia outbreak investigation in Kosovo: case control and environmental studies.  
472 *Emerg Infect Dis* 8:69–73.
- 473 20. Pazdiora P, Morávková I, Nocarová D, Velkoborská M, Valecková K. 2002. A water-borne  
474 epidemic of tularemia in Chlumcany. *Epidemiol Mikrobiol Imunol* 51:23–25.
- 475 21. Mignani E, Palmieri F, Fontana M, Marigo S. 1988. Italian epidemic of waterborne  
476 tularaemia. *Lancet* 2:1423.
- 477 22. Greco D, Allegrini G, Tizzi T, Ninu E, Lamanna A, Luzi S. 1987. A waterborne tularemia  
478 outbreak. *Eur J Epidemiol* 3:35–38.



- 479 23. Chitadze N, Kuchuloria T, Clark DV, Tsertsvadze E, Chokheli M, Tsertsvadze N,  
480 Trapaidze N, Lane A, Bakanidze L, Tsanova S, Hepburn MJ, Imnadze P. 2009. Water-  
481 borne outbreak of oropharyngeal and glandular tularemia in Georgia: investigation and  
482 follow-up. *Infection* 37:514–521.
- 483 24. Guerpillon B, Boibieux A, Guenne C, Ploton C, Ferry T, Maurin M, Forestier E, Dauwalder  
484 O, Manipoud P, Ltaïef-Boudrigou A, Gürkov R, Vandenesch F, Bouchiat C. 2016. Keep an  
485 Ear Out for *Francisella tularensis*: Otomastoiditis Cases after Canyoneering. *Front Med* 3:9.
- 486 25. Ughetto E, Héry-Arnaud G, Cariou M-E, Pelloux I, Maurin M, Caillon J, Moreau P, Ygout  
487 J-F, Corvec S. 2015. An original case of *Francisella tularensis* subsp. *holarctica* bacteremia  
488 after a near-drowning accident. *Infect Dis* 47:588–590.
- 489 26. Jellison WL, Epler DC, Kuhns E, Kohls GM. 1950. Tularemia in man from a domestic rural  
490 water supply. *Public Health Rep* 65:1219–1226.
- 491 27. Forsman M, Henningson EW, Larsson E, Johansson T, Sandström G. 2000. *Francisella*  
492 *tularensis* does not manifest virulence in viable but non-culturable state. *FEMS Microbiol*  
493 *Ecol* 31:217–224.
- 494 28. Berrada ZL, Iii SRT. 2011. Survival of *Francisella tularensis* Type A in brackish-water.  
495 *Arch Microbiol* 193:223–226.
- 496 29. Abd H, Johansson T, Golovliov I, Sandström G, Forsman M. 2003. Survival and Growth of  
497 *Francisella tularensis* in *Acanthamoeba castellanii*. *Appl Environ Microbiol* 69:600–606.

- 498 30. Thelaus J, Andersson A, Mathisen P, Forslund A-L, Noppa L, Forsman M. 2009. Influence  
499 of nutrient status and grazing pressure on the fate of *Francisella tularensis* in lake water.  
500 FEMS Microbiol Ecol 67:69–80.
- 501 31. Schulze C, Heuner K, Myrtenäs K, Karlsson E, Jacob D, Kutzer P, Große K, Forsman M,  
502 Grunow R. 2016. High and novel genetic diversity of *Francisella tularensis* in Germany and  
503 indication of environmental persistence. *Epidemiol Infect* 144:3025–3036.
- 504 32. Ul'ianova NI, Bessonova MA, Panasik LN, Svimonishvili VN, Grishina LS. 1982. Results  
505 of prolonged study of flood plain-swamp endemic foci of tularemia, and its prophylaxis in  
506 the Leningrad Region. *Zh Mikrobiol Epidemiol Immunobiol* 2:104–107.
- 507 33. Young LS, Bickness DS, Archer BG, Clinton JM, Leavens LJ, Feeley JC, Brachman PS.  
508 1969. Tularemia epidemia: Vermont, 1968. Forty-seven cases linked to contact with  
509 muskrats. *N Engl J Med* 280:1253–1260.
- 510 34. Wilson ME, Maksaev G, Haswell ES. 2013. MscS-like mechanosensitive channels in plants  
511 and microbes. *Biochemistry (Mosc)* 52:5708–5722.
- 512 35. Kung C, Martinac B, Sukharev S. 2010. Mechanosensitive channels in microbes. *Annu Rev*  
513 *Microbiol* 64:313–329.
- 514 36. Levina N, Töttemeyer S, Stokes NR, Louis P, Jones MA, Booth IR. 1999. Protection of  
515 *Escherichia coli* cells against extreme turgor by activation of MscS and MscL  
516 mechanosensitive channels: identification of genes required for MscS activity. *EMBO J*  
517 18:1730–1737.

- 518 37. Geer LY, Domrachev M, Lipman DJ, Bryant SH. 2002. CDART: protein homology by  
519 domain architecture. *Genome Res* 12:1619–1623.
- 520 38. LoVullo ED, Molins-Schneekloth CR, Schweizer HP, Pavelka MS. 2009. Single-copy  
521 chromosomal integration systems for *Francisella tularensis*. *Microbiology* 155:1152–1163.
- 522 39. LoVullo ED, Sherrill LA, Perez LL, Pavelka MS. 2006. Genetic tools for highly pathogenic  
523 *Francisella tularensis* subsp. *tularensis*. *Microbiology* 152:3425–3435.
- 524 40. Schneider CA, Rasband WS, Eliceiri KW. 2012. NIH Image to ImageJ: 25 years of image  
525 analysis. *Nat Methods* 9:671–675.
- 526 41. Koprowski P, Grajkowski W, Balcerzak M, Filipiuk I, Fabczak H, Kubalski A. 2015.  
527 Cytoplasmic Domain of MscS Interacts with Cell Division Protein FtsZ: A Possible Non-  
528 Channel Function of the Mechanosensitive Channel in *Escherichia Coli*. *PLoS ONE* 10.
- 529 42. Iscla I, Wray R, Wei S, Posner B, Blount P. 2014. Streptomycin potency is dependent on  
530 MscL channel expression. *Nat Commun* 5:4891.
- 531 43. Jiafeng L, Fu X, Chang Z. 2015. Hypoionic shock treatment enables aminoglycosides  
532 antibiotics to eradicate bacterial persisters. *Sci Rep* 5:14247.
- 533 44. Pavlovsky EN. 1966. *Natural Nidality of Transmissible Diseases*. University of Illinois  
534 Press, Urbana.
- 535 45. Bent ZW, Brazel DM, Tran-Gyamfi MB, Hamblin RY, VanderNoot VA, Branda SS. 2013.  
536 Use of a Capture-Based Pathogen Transcript Enrichment Strategy for RNA-Seq Analysis of

- 537 the *Francisella Tularensis* LVS Transcriptome during Infection of Murine Macrophages.  
538 PLOS ONE 8:e77834.
- 539 46. Eliasson H, Lindbäck J, Nuorti P, Arneborn M, Giesecke J, Tegnell A. 2002. The 2000  
540 tularemia outbreak : a case-control study of risk factors in disease-endemic and emergent  
541 areas, Sweden. *Emerg Infect Dis* 8:956–960.
- 542 47. Svensson K, Bäck E, Eliasson H, Berglund L, Granberg M, Karlsson L, Larsson P,  
543 Forsman M, Johansson A. 2009. Landscape epidemiology of tularemia outbreaks in  
544 Sweden. *Emerg Infect Dis* 15:1937–1947.
- 545 48. Lundström JO, Andersson A-C, Bäckman S, Schäfer ML, Forsman M, Thelaus J. 2011.  
546 Transstadial transmission of *Francisella tularensis holarctica* in mosquitoes, Sweden. *Emerg*  
547 *Infect Dis* 17:794–799.
- 548 49. Bäckman S, Näslund J, Forsman M, Thelaus J. 2015. Transmission of tularemia from a  
549 water source by transstadial maintenance in a mosquito vector. *Sci Rep* 5:7793.
- 550 50. Anda P, Segura del Pozo J, Díaz García JM, Escudero R, García Peña FJ, López Velasco  
551 MC, Sellek RE, Jiménez Chillarón MR, Sánchez Serrano LP, Martínez Navarro JF. 2001.  
552 Waterborne outbreak of tularemia associated with crayfish fishing. *Emerg Infect Dis* 7:575–  
553 582.
- 554 51. Malcolm HR, Maurer JA. 2012. The Mechanosensitive Channel of Small Conductance  
555 (MscS) Superfamily: Not Just Mechanosensitive Channels Anymore. *ChemBioChem*  
556 13:2037–2043.

557 **Figure Legends**

558 **Figure 1:** FTL\_1753 is required for *F. tularensis* subsp. *holarctica* to survive hypoosmotic  
559 shock. **A-B)** Survival data from downshock experiments performed in BHI broth. Bacteria were  
560 grown in BHI + 300mM NaCl, then diluted in BHI +300, +200, +100 or +0 mM NaCl,  
561 producing hypoosmotic shocks of 0, 100, 200 and 300mM, respectively. **C)** survival data for  
562 PBS-equilibrated bacteria diluted into water retrieved from a freshwater lake or double-distilled  
563 H<sub>2</sub>O. Statistical differences were determined by one-way ANOVA with Dunnett's post test,  
564 \*p<0.05, \*\*p<0.01, \*\*\*p<0.001. Each experiment was performed a minimum of three times.

565

566 **Figure 2:** Sensitivity profiles of wild-type,  $\Delta$ FTL\_1753 and  $\Delta$ FTL\_0945 to detergents and  
567 H<sub>2</sub>O<sub>2</sub>. Early log phase bacteria were exposed to the indicated concentrations of detergents/H<sub>2</sub>O<sub>2</sub>  
568 in media for one hour before dilution and plating to enumerate viable CFUs. Representative  
569 results shown from a minimum of four repeats. No statistically significant differences were  
570 found by one-way ANOVA with Dunnett's post-test.

571

572 **Figure 3:** FTL\_1753 does not contribute to virulence in the host niche, but is required to survive  
573 the transition from that niche to fresh water. **A)** Viable CFUs of indicated *F. tularensis* strains  
574 recovered from Raw 264.7 macrophages in a gentamicin protection assay at 2 and 20 hours post-  
575 infection, pooled data from three repeats. **B)** Survival curves of C57BL/6J mice (n=8 per group)  
576 infected with 10<sup>4</sup> CFU of the indicated strains of *F. tularensis* LVS. **C)** Viable CFUs of indicated  
577 *F. tularensis* strains recovered from infected RAW 264.7 macrophages based on lysis buffer  
578 used. PBS-deox: 0.1% (w/v) sodium deoxycholate in PBS. One-way ANOVA with Tukey's  
579 post-test, \*p<0.05, \*\* p<0.01.

580

581 **Figure 4:**  $\Delta$ FTL<sub>1753</sub> cells are smaller in average size compared to the wild-type. **A-B)** SEM  
582 images of wild-type (A) and  $\Delta$ FTL<sub>1753</sub> (B) cells at 3,000X. Scale bars: 5 $\mu$ m. **C-D)** SEM  
583 images of wild-type (C) and  $\Delta$ FTL<sub>1753</sub> (D) cells at 10,000X. Scale bars: 1 $\mu$ m. **E-G)** Cells  
584 (n>180 per group) were traced in Image J and subjected to the indicated analyses. E) 2-  
585 dimensional area of cell traces. F) the perimeter length of cell traces. G) the aspect ratio of  
586 ellipses fitted to cell traces. Two-tailed, unpaired t-test, \*\*\*\*p<0.0001. Negative staining  
587 experiments with uranyl acetate and phosphotungstic acid followed by TEM yielded similar  
588 results.

589

590 **Figure 5:** Summary of comparative alignments of loci predicted to encode mechanosensitive  
591 channels in *F. tularensis* subspecies. White lines represent amino acid substitutions relative to  
592 subsp. *holarctica* except where no subsp. *holarctica* sequence is aligned. Gray shading signifies  
593 a current pseudogene annotation in RefSeq. For alignment detail, see supplementary Fig. 5-8.

594

595

596

597

598

599

600

601

602

603 **Table 1:** Primers and plasmids used in this study.

| Name                | Sequence (5'-3')                                            | Description                                                                          |
|---------------------|-------------------------------------------------------------|--------------------------------------------------------------------------------------|
| 1753_UP_F           | TATTAAGCGGCCGCAATGTGTGA<br>AATAACTTTTATACCACTTTTAGC<br>AGAT | For upstream flank in FTL_1753<br>deletion construct                                 |
| 1753_UP_R           | GAAGCGGAATTCACTATTGCCTA<br>ATTGATCGAACATCGC                 | For upstream flank in FTL_1753<br>deletion construct                                 |
| 1753_DOWN_F         | TCCCCGGAATTCATATGCAAAAA<br>CGTTACTTTCTTCAGATGAAATC<br>C     | For downstream flank in<br>FTL_1753 deletion construct                               |
| 1753_DOWN_R         | AATCTTGTCGACTGCTCACGGAA<br>CTCCTCATTTGAGTC                  | For downstream flank in<br>FTL_1753 deletion construct                               |
| 0945_UP_F           | TATTAAGTCGACCTTTCAGGTAA<br>GACATCAGCAG                      | For upstream flank in FTL_0945<br>deletion construct                                 |
| 0945_UP_R           | TATTAAGGATCCAACGTTGATAT<br>TATGTTGAAAAGCATTTCATT            | For upstream flank in FTL_0945<br>deletion construct                                 |
| 0945_DOWN_F         | TATTAAGGATCCTAGGATGTATG<br>AAACTATTGAGCATGG                 | For downstream flank in<br>FTL_0945 deletion construct                               |
| 0945_DOWN_R         | ATTATGCGGCCGCTGGCATTATT<br>GCTATTGATATATTCCTG               | For downstream flank in<br>FTL_0945 deletion construct                               |
| 0945_SCREEN_F       | AGCAAATACCAAACAACGATAA<br>CTGCT                             | For screening for FTL_0945<br>deletion                                               |
| 0945_SCREEN_R       | TCTTTTAATTAATTGCTCAAGCTT<br>TTGGGCA                         | For screening for FTL_0945<br>deletion                                               |
| pBFR_F              | GCTCGTCTAGAGATCCATACCCA<br>TGATGGTTACTATTG                  | Bacterioferritin Promoter for<br>plasmid complementation                             |
| pBFR_R              | GCCGCGGGATCCTATTGTTACCT<br>CCATTATTTAAACTCTAATCA            | Bacterioferritin Promoter for<br>plasmid complementation                             |
| 1753_COMP_F         | TCATCAGGATCCATGTTTCGATCA<br>ATTAGGCAATAGTGG                 | For FTL_1753 plasmid<br>complementation                                              |
| 1753_COMP_R         | GCTCCGAATTCACCTGATAATAA<br>AAAATAACGCTCATCACT               | For FTL_1753 plasmid<br>complementation                                              |
| MCS <sub>4</sub> _1 | CTAGAGAATTCGGATCCG                                          | Phosphorylated oligo, for<br>generation of pKK214-MCS4 via<br>annealed oligo cloning |

|                     |                    |                                                                                |
|---------------------|--------------------|--------------------------------------------------------------------------------|
| MCS <sub>4</sub> _2 | AATTCGGATCCGAATTCT | Phosphorylated oligo, for generation of pKK214-MCS4 via annealed oligo cloning |
| pMP812              |                    | sacB allelic exchange vector, from (38)                                        |
| pKK214              |                    | Expression/complementation plasmid, from (29)                                  |

604

605



| Primer name         | Sequence (5'-3')                                         | Description                                                                          |
|---------------------|----------------------------------------------------------|--------------------------------------------------------------------------------------|
| 1753_UP_F           | TATTAAGCGGCCCGCAATGTGTGAAAT<br>AACTTTTATACCACTTTTAGCAGAT | For upstream flank in FTL_1753<br>deletion construct                                 |
| 1753_UP_R           | GAAGCGGAATTCACCTATTGCCTAATT<br>GATCGAACATCGC             | For upstream flank in FTL_1753<br>deletion construct                                 |
| 1753_DOWN_F         | TCCCCGGAATTCTAATGCAAAAACGT<br>TACTTTCTTCAGATGAAATCC      | For downstream flank in FTL_1753<br>deletion construct                               |
| 1753_DOWN_R         | AATCTTGTCGACTGCTCACGGAATC<br>CTCATTTGAGTC                | For downstream flank in FTL_1753<br>deletion construct                               |
| 0945_UP_F           | TATTAAGTCGACCTTTCAGGTAAGAC<br>ATCAGCAG                   | For upstream flank in FTL_0945<br>deletion construct                                 |
| 0945_UP_R           | TATTAAGGATCCAACGTTGATATTAT<br>GTTGAAAAGCATTTCATT         | For upstream flank in FTL_0945<br>deletion construct                                 |
| 0945_DOWN_F         | TATTAAGGATCCTAGGATGTATGAAA<br>CTATTGAGCATGG              | For downstream flank in FTL_0945<br>deletion construct                               |
| 0945_DOWN_R         | ATTATGCGGCCGCTGGCATTATTGCT<br>ATTGATATATTCCTG            | For downstream flank in FTL_0945<br>deletion construct                               |
| 0945_SCREEN_F       | AGCAAATACCAAACAACGATAACTG<br>CT                          | For screening for FTL_0945 deletion                                                  |
| 0945_SCREEN_R       | TCTTTTAATTAATTGCTCAAGCTTTTG<br>GGCA                      | For screening for FTL_0945 deletion                                                  |
| pBFR_F              | GCTCGTCTAGAGATCCATACCCATGA<br>TGGTTACTATTG               | Bacterioferritin Promoter for plasmid<br>complementation                             |
| pBFR_R              | GCCGCGGGATCCTATTGTTACCTCCA<br>TTATTTAAACTCTAATCA         | Bacterioferritin Promoter for plasmid<br>complementation                             |
| 1753_COMP_F         | TCATCAGGATCCATGTTTCGATCAATT<br>AGGCAATAGTGG              | For FTL_1753 plasmid<br>complementation                                              |
| 1753_COMP_R         | GCTCCGAATTCACCTGATAATAAAAA<br>ATAACGCTCATCACT            | For FTL_1753 plasmid<br>complementation                                              |
| MCS <sub>4</sub> _1 | CTAGAGAATTCGGATCCG                                       | Phosphorylated oligo, for generation<br>of pKK214-MCS4 via annealed oligo<br>cloning |
| MCS <sub>4</sub> _2 | AATTCGGATCCGAATTCT                                       | Phosphorylated oligo, for generation<br>of pKK214-MCS4 via annealed oligo<br>cloning |
| pMP812              |                                                          | sacB allelic exchange vector, from<br>(38)                                           |
| pKK214              |                                                          | Expression/complementation<br>plasmid, from (29)                                     |

**Table 1:** Primers and plasmids used in this study.

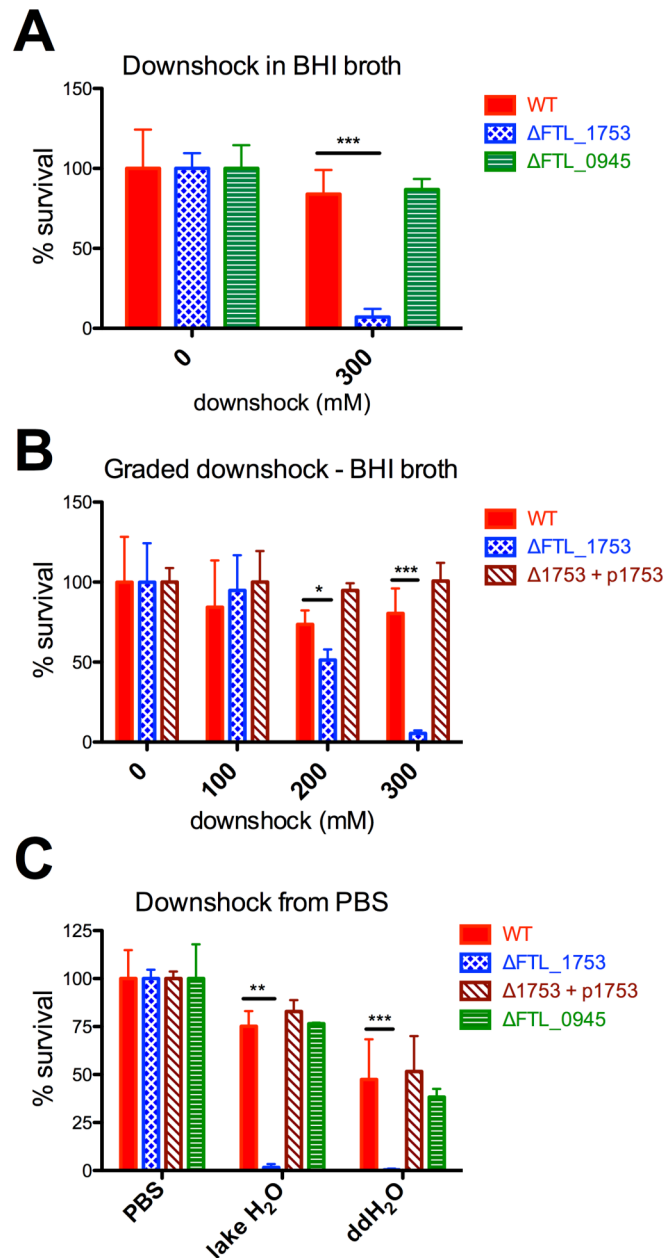

**Figure 1:** FTL\_1753 is required for *F. tularensis* subsp. *holarctica* to survive hypoosmotic shock. **A-B)** Survival data from downshock experiments performed in BHI broth. Bacteria were grown in BHI + 300mM NaCl, then diluted in BHI +300, +200, +100 or +0 mM NaCl, producing hypoosmotic shocks of 0, 100, 200 and 300mM, respectively. **C)** survival data for PBS-equilibrated bacteria diluted into water retrieved from a freshwater lake or double-distilled H<sub>2</sub>O. Statistical differences were determined by one-way ANOVA with Dunnett's post test, \* $p < 0.05$ , \*\* $p < 0.01$ , \*\*\* $p < 0.001$ . Each experiment was performed a minimum of three times.

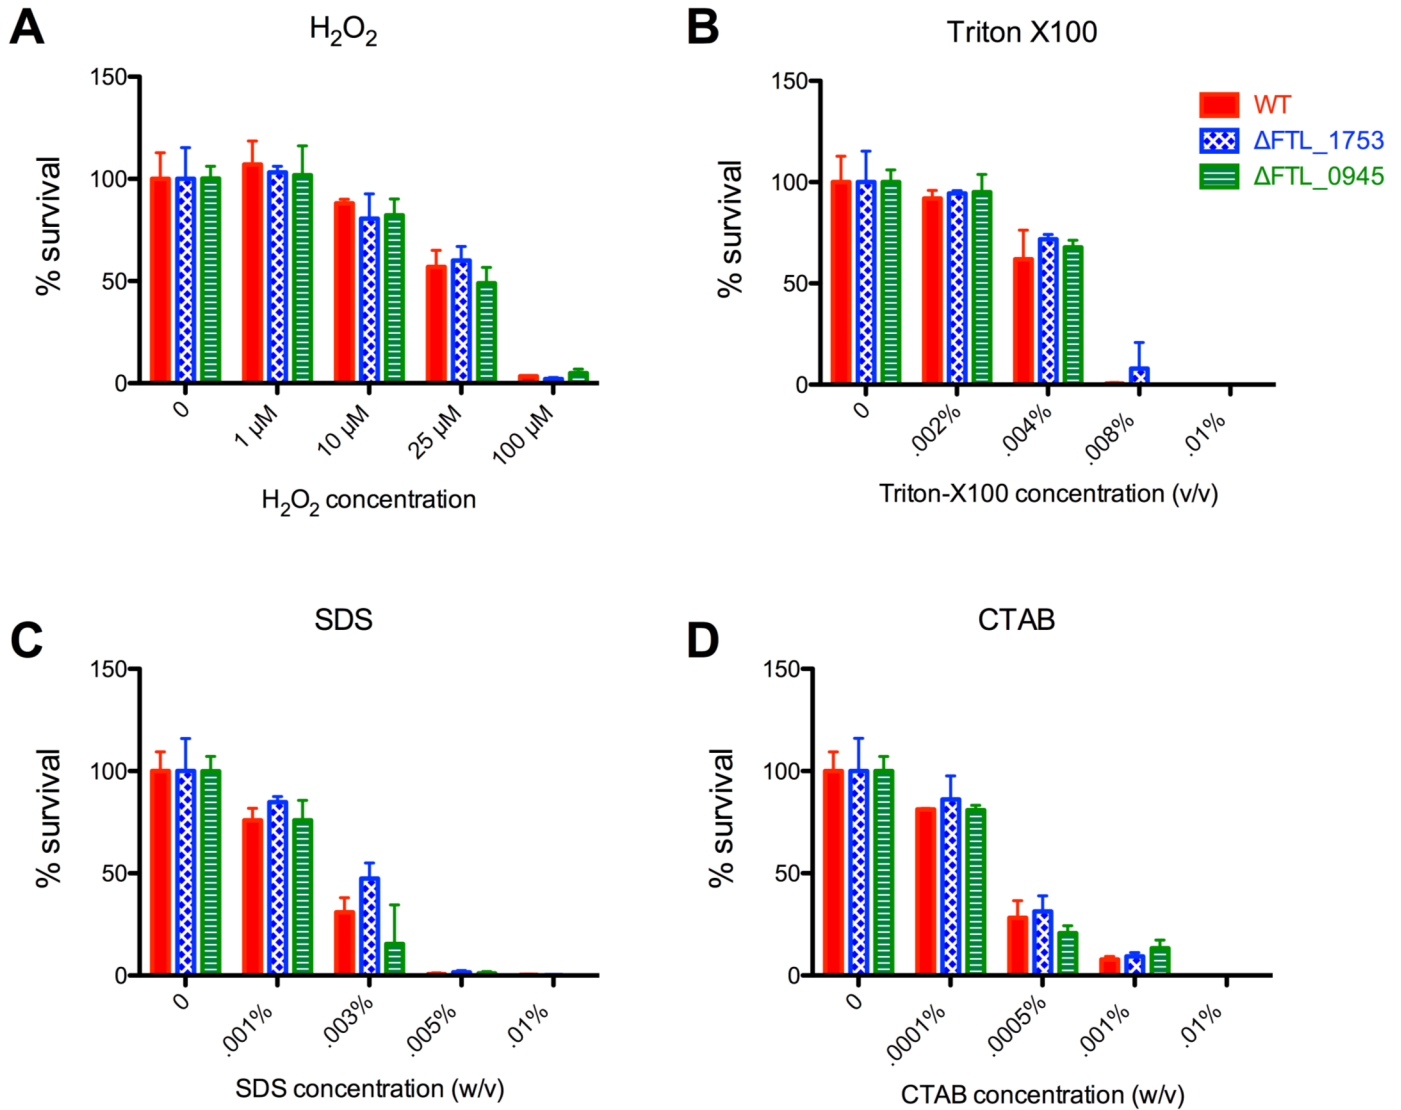

**Figure 2:** Sensitivity profiles of wild-type,  $\Delta FTL_{1753}$  and  $\Delta FTL_{0945}$  to detergents and  $H_2O_2$ . Early log phase bacteria were exposed to the indicated concentrations of detergents/ $H_2O_2$  in media for one hour before dilution and plating to enumerate viable CFUs. Representative results shown from a minimum of four repeats. No statistically significant differences were found by one-way ANOVA with Dunnett's post-test.

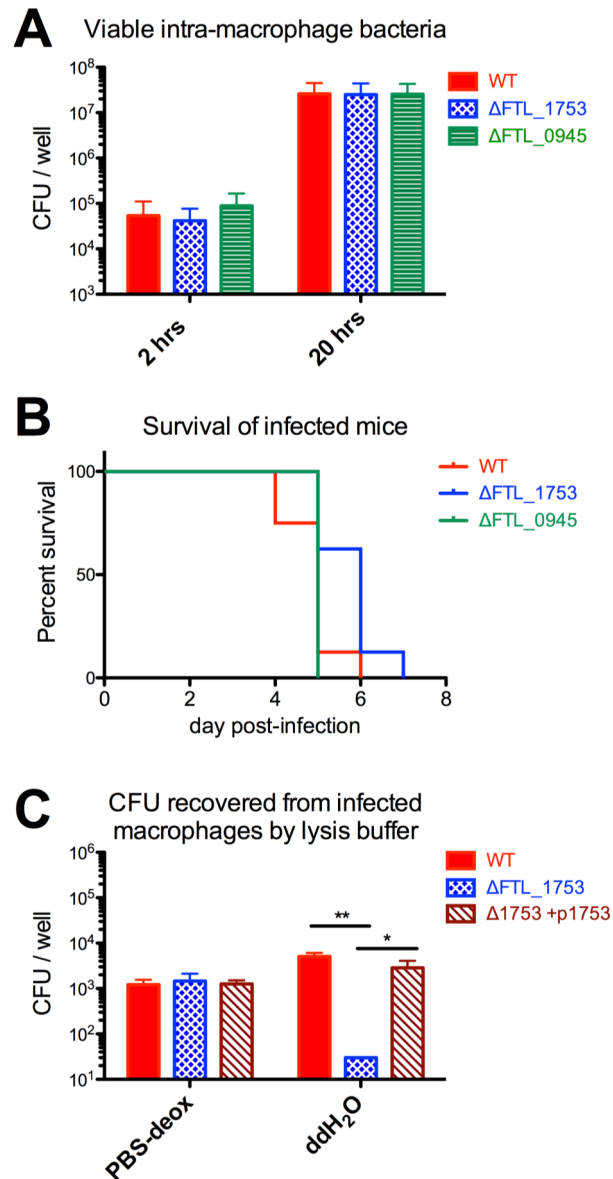

**Figure 3:** FTL\_1753 does not contribute to virulence in the host niche, but is required to survive the transition from that niche to fresh water. **A)** Viable CFUs of indicated *F. tularensis* strains recovered from Raw 264.7 macrophages in a gentamicin protection assay at 2 and 20 hours post-infection, pooled data from three repeats. **B)** Survival curves of C57BL/6J mice (n=8 per group) infected with  $10^4$  CFU of the indicated strains of *F. tularensis* LVS. **C)** Viable CFUs of indicated *F. tularensis* strains recovered from infected RAW 264.7 macrophages based on lysis buffer used. PBS-deox: 0.1% (w/v) sodium deoxycholate in PBS. One-way ANOVA with Tukey's post-test, \* $p < 0.05$ , \*\*  $p < 0.01$ .

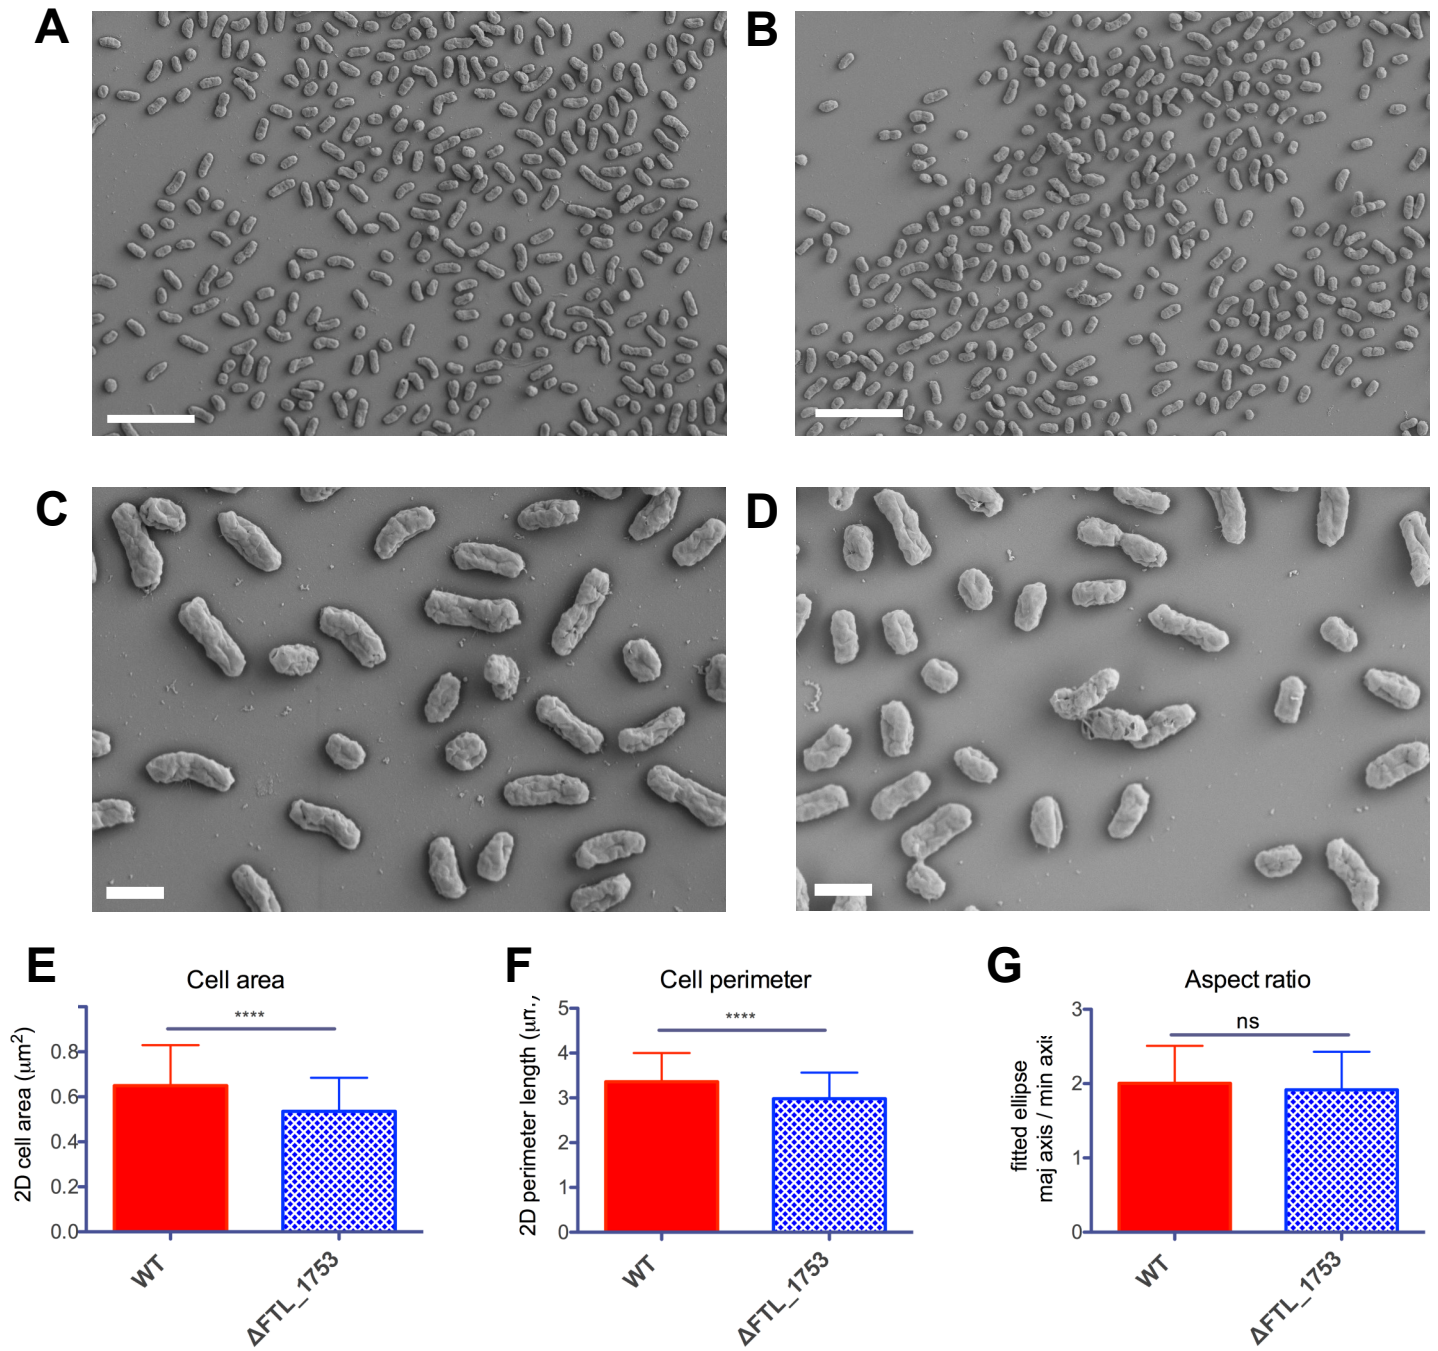

**Figure 4:**  $\Delta$ FTL\_1753 cells are smaller in average size compared to the wild-type. **A-B)** SEM images of wild-type (A) and  $\Delta$ FTL\_1753 (B) cells at 3,000X. Scale bars: 5 $\mu\text{m}$ . **C-D)** SEM images of wild-type (C) and  $\Delta$ FTL\_1753 (D) cells at 10,000X. Scale bars: 1 $\mu\text{m}$ . **E-G)** Cells ( $n > 180$  per group) were traced in Image J and subjected to the indicated analyses. E) 2-dimensional area of cell traces. F) the perimeter length of cell traces. G) the aspect ratio of ellipses fitted to cell traces. Two-tailed, unpaired t-test, \*\*\*\* $p < 0.0001$ . Negative staining experiments with uranyl acetate and phosphotungstic acid followed by TEM yielded similar results.

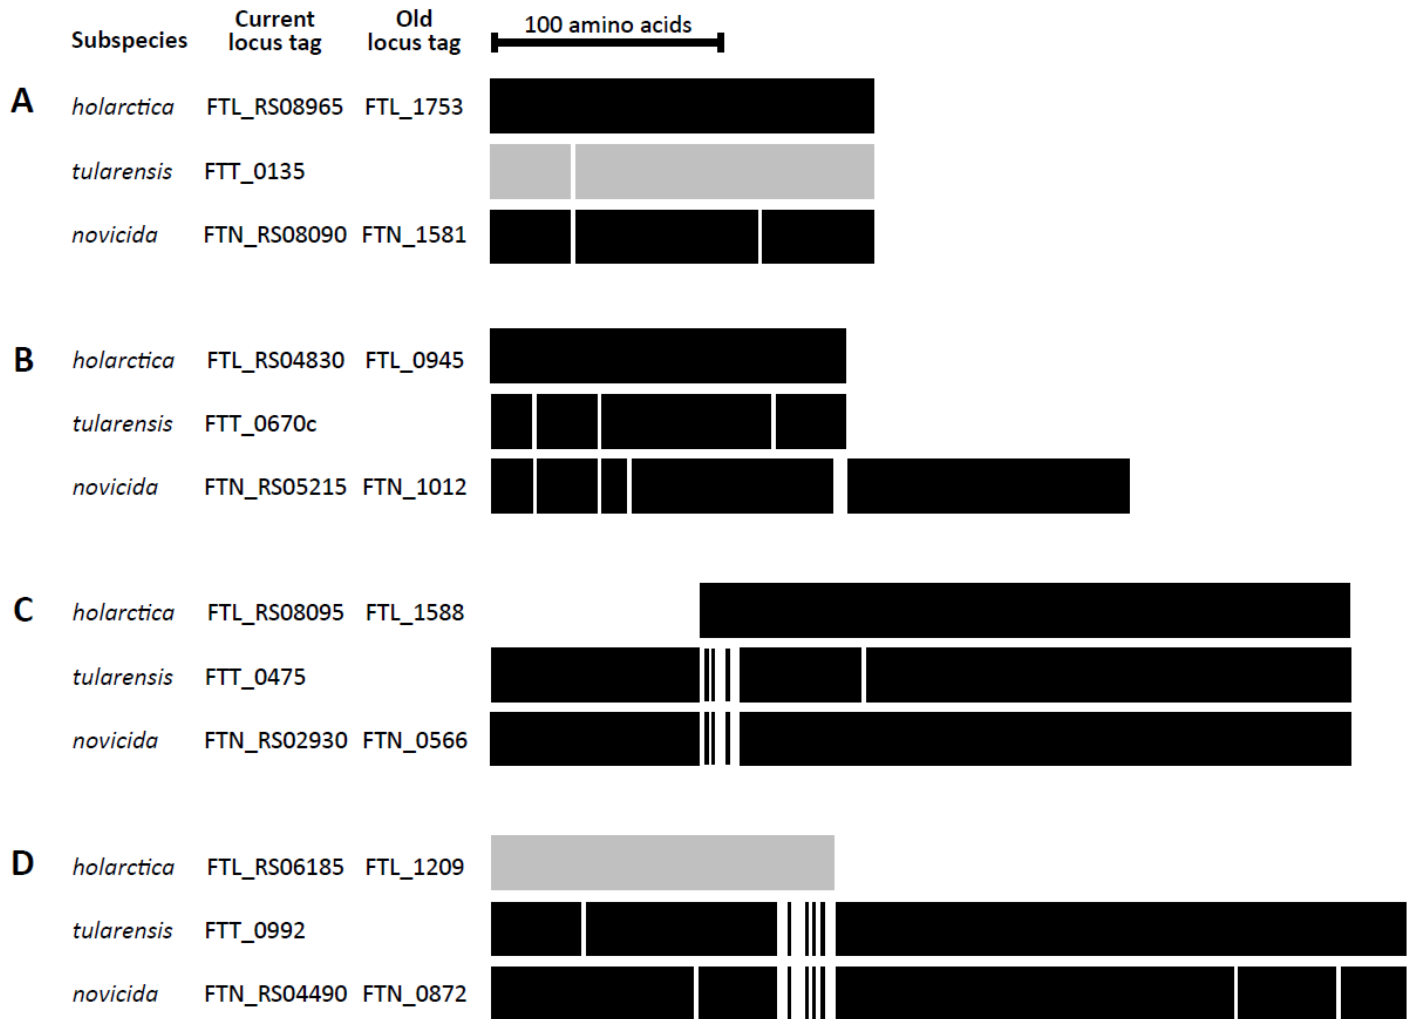

**Figure 5:** Summary of comparative alignments of loci predicted to encode mechanosensitive channels in *F. tularensis* subspecies. White lines represent amino acid substitutions relative to subsp. *holarctica* except where no subsp. *holarctica* sequence is aligned. Gray shading signifies a current pseudogene annotation in RefSeq. For alignment detail, see supplementary figures 5-8.
